# Supplementary material
Source: ML conference proceedings conference paper supplement (https://openaccess.thecvf.com/content/ICCV2025/html/Wei_EMD_Explicit_Motion_ICCV_2025_paper.html)
Supplement: Supplementary file 1 [file Wei_EMD_Explicit_Motion_ICCV_2025_supplemental.pdf]

# EMD: Explicit Motion Modeling for High-Quality Street Gaussian Splatting

## Supplementary Material

### A. Overview

The supplementary material includes the subsequent components.

- Additional Visualization Videos
- Implementation Details
  - Training Schemes
  - Training Details
  - Parameters and Efficiency
- Parameter Sensitivity

### B. Additional Visualization Videos

Please double-click the “Demo Webpage-Please wait until loaded.html” file and open it in your browser. This offline webpage contains videos covering the following experiments:

- Self-supervised Comparison
- Box Supervised Comparison
- Novel Trajectory Synthesis
- Temporal Embedding Evolution

Due to the numerous videos, **please wait for the webpage until loaded.**

### C. Implementation Details

#### C.1. Training Schemes

**LiDAR Prior Initialization.** To initialize the positions of the 3D Gaussians, we leverage the LiDAR point cloud captured by the vehicle instead of using the original SFM [42] point cloud to provide a better geometric structure. To reduce model size, we also downsample the entire point cloud by voxelizing it and filtering out points outside the image. For colors, we initialize them randomly.

**Optimization Objective.** Following Street Gaussian, we introduce the sky supervision loss  $\mathcal{L}_{sky}$  into the original loss function proposed by S3Gaussian. Subsequently, we get a composed training loss function which can impose various constraints to our model.

$$\mathcal{L} = \mathcal{L}_{color} + \lambda_{depth}\mathcal{L}_{depth} + \lambda_{feat}\mathcal{L}_{feat} + \lambda_{tv}\mathcal{L}_{tv} + \lambda_{sky}\mathcal{L}_{sky} + \lambda_{reg}\mathcal{L}_{reg} \quad (16)$$

Here,  $\mathcal{L}_{depth}$  is the mean square error (MSE) loss between the rendered depth map and the estimated depth map from the LiDAR point cloud, which aids in supervising the expected position of 3D Gaussians.  $\mathcal{L}_{feat}$  is also the L2 loss of semantic features to reduce the gap between both planes.  $\mathcal{L}_{tv}$  is a total-variational loss based on grids to make rendered

objects smoother.  $\mathcal{L}_{color}$  is the main loss to give constraints to the reconstruction process formulated by:

$$\mathcal{L}_{color} = \mathcal{L}_{rgb} + \lambda_{ssim}\mathcal{L}_{sim} \quad (17)$$

Furthermore,  $\mathcal{L}_{reg}$  is organized as:

$$\mathcal{L}_{reg} = \mathcal{L}_{z_k} + \mathcal{L}_{\Delta} \quad (18)$$

where  $\mathcal{L}_{z_k}$  is local smoothness regularization for Gaussian embeddings in the method section.  $\mathcal{L}_{\Delta}$  represents a combination of regularization for coarse and fine deformations, restricting their values near zero. We also detail the coefficients for loss in Tab. 7.

Table 7. Loss function coefficients

| $\lambda_{depth}$ | $\lambda_{feat}$ | $\lambda_{feat}$ | $\lambda_{tv}$ | $\lambda_{sky}$ | $\lambda_{reg}$ |
|-------------------|------------------|------------------|----------------|-----------------|-----------------|
| 0.5               | 0.1              | 0.1              | 0.1            | 0.1             | 0.01            |

Table 8. Parameter sensitivity analysis on the D32 dataset, highlighting the effect of varying the dimensions of Gaussian embeddings  $\mathbf{z}_k$  and temporal embeddings  $\mathbf{z}_w$ . All experiments are conducted in the self-supervised setting. Best performances are highlighted in **bold**.  $\uparrow$  indicates higher is better, while  $\downarrow$  indicates lower is better. We also include the changes in model parameters relative to the adopted setting.

| $\mathbf{z}_k/\mathbf{z}_w$ | Parameters | Full Image      |                 |                    | Vehicle         |
|-----------------------------|------------|-----------------|-----------------|--------------------|-----------------|
|                             |            | PSNR $\uparrow$ | SSIM $\uparrow$ | LPIPS $\downarrow$ | PSNR $\uparrow$ |
| 32/4                        | /          | <b>32.50</b>    | <b>0.933</b>    | <b>0.082</b>       | 29.04           |
| 128/4                       | +14400     | 32.22           | 0.925           | 0.086              | <b>29.05</b>    |
| 8/4                         | -3600      | 31.25           | 0.910           | 0.128              | 27.75           |
| 32/4                        | /          | <b>32.50</b>    | <b>0.933</b>    | 0.082              | <b>29.04</b>    |
| 32/16                       | +14.42M    | 32.38           | 0.930           | <b>0.081</b>       | 29.01           |
| 32/1                        | -3.60M     | 30.55           | 0.898           | 0.136              | 27.04           |

#### C.2. Training Details

For S3Gaussian, we train the entire pipeline for 50,000 iterations using the Adam optimizer. Following the original S3Gaussian setup, we perform a warm-up phase for each scene, employing 5,000 iterations to train a coarse representation using vanilla 3D Gaussians. After this warm-up phase, we integrate the proposed dual-scale deformation network, which is jointly optimized with the HexPlane. To implement a coarse-to-fine training strategy, temporal embeddings  $N(i)$  are progressively increased from  $N_{min}$  to  $N_{max}$  in 20,000 iterations, allowing for the gradual motion modeling of objects. Since S3Gaussian is evaluated on 50 frames per clip

for each scene, we ensure a fair comparison by conducting all self-supervised validation experiments on the first clip of 32 dynamic scenes. Other configurations, including the detailed setup of the HexPlane and learning rates, are kept consistent with the S3Gaussian. For StreetGaussian, the entire method is trained for 30,000 iterations on a subset of eight selected scenes from the StreetGaussian dataset. Unlike the self-supervised method, we bind the proposed EMD to the vehicle Gaussians in each scene. Temporal embeddings are applied based on the time each vehicle appears within the scene. All other settings, including detailed configurations, remain consistent with those described in StreetGaussian. All experiments are conducted on a single NVIDIA A800 GPU.

## D. Parameter Sensitivity

To analyze the sensitivity of model performance to the dimensions of Gaussian embeddings  $\mathbf{z}_k$  and temporal embeddings  $\mathbf{z}_w$  (derived from the learnable embedding matrix  $\mathbf{W}$ ), we conduct experiments by varying these dimensions. In the original setup,  $\mathbf{z}_k$  is set to 32 and  $\mathbf{z}_w$  to 4. Tab. 8 summarizes the results, demonstrating how these changes influence performance under the self-supervised setting.

The results reveal that reducing the embedding dimensions leads to significant performance degradation. This is primarily due to the reduced capacity to effectively model the motion of dynamic objects, which is crucial for high-quality reconstruction. On the other hand, increasing the embedding dimensions offers only marginal performance improvements. However, due to the large number of Gaussians in the driving scenes, the higher embedding dimensions result in a substantial increase in the total number of model parameters, leading to a higher computational cost. These findings highlight the trade-off between embedding dimension size and overall model efficiency. While lower dimensions compromise the ability to capture dynamic motion, higher dimensions introduce considerable overhead without proportional gains in performance. The adopted embedding configuration achieves a good balance, maintaining strong performance while keeping the parameter count manageable.

## E. Limitation

Although EMD effectively addresses the challenge of modeling dynamic objects with varying speeds by incorporating learnable embeddings, some limitations remain. Existing street Gaussian methods do not account for environmental lighting, yet lighting effects play a crucial role in the quality of reconstructions under different lighting conditions. In future work, we plan to explore the possibility of developing a plug-and-play technique to enhance lighting effects in existing methods.
